# Supplementary material for: Prioritising Mangrove Ecosystem Services Results in Spatially Variable Management Priorities
Source: PLOS journal article supplement (doi:10.1371/journal.pone.0151992), 2016-03-23
Supplement: S11 (10.1371/journal.pone.0151992.s011) [file journal.pone.0151992.s011]

S1 Table. Spatial data on layers, sources and data processing

| Layer name        | Mapped feature                               | Source                                                                                              | Dataset details                                                                                                                                                                                                                      | Processing undertaken (software used)                                                                      | Processing details                                                                                                                                                                                                                                                                                                                                                |
|-------------------|----------------------------------------------|-----------------------------------------------------------------------------------------------------|--------------------------------------------------------------------------------------------------------------------------------------------------------------------------------------------------------------------------------------|------------------------------------------------------------------------------------------------------------|-------------------------------------------------------------------------------------------------------------------------------------------------------------------------------------------------------------------------------------------------------------------------------------------------------------------------------------------------------------------|
| Coastline         | Coastline                                    | United States Geological Survey (USGS)                                                              | Derived from Shuttle Radar Topography Mission (SRTM) global 1 arc-second digital elevation model (DEM; ~30 m horizontal resolution)                                                                                                  | Extracted areas above sea level (e.g., 0 metres above mean sea level (masl)) and polygonised (QGIS 2.10)   | Pixels in the DEM above 0 masl were selected using a raster calculator, and converted to simplified polygons. Some manual digitizing was required where the coastline deviated dramatically from visual comparison with high resolution satellite imagery, or where changes in the coastline due to development, etc., have occurred since the DEM was developed. |
| Mangroves         | Mangrove                                     | 1   Fiji Department of Forestry, Ministry of Fisheries and Forests<br>2   Hamilton and Casey (2014) | 1   Digitized for main Fiji islands (Viti Levu, Vnaua Levu, and Taveuni only) from 2001 Landsat ETM+ data<br>2   Multiple dataset 'Big Data' fusion approach – see source. Raster attribute is m <sup>2</sup> of mangrove per pixel. | Converted raster areas in (2) to polygons and merged with (1) to create a single layer (QGIS 2.10)         | Raster cells from (2) with values greater than 225 (e.g., greater than 25% mangrove) were selected with a raster calculator and converted to polygons. The new combined layer was clipped to the coastline layer to ensure topological continuity.                                                                                                                |
| Reefs             | 1   Fringing reefs<br>2   Non-fringing reefs | Fiji Department of Lands, Ministry of Lands and Mineral Resources                                   | Digitized from aerial photographs captured in 1994 and 1996                                                                                                                                                                          | Merged fringing reef (1) and non-fringing reef (2) layers into a single combined reef layer (QGIS 2.10)    | Erased overlap with coastline by overwriting reefs with coastline layer.                                                                                                                                                                                                                                                                                          |
| Habitable area    | Liveable / build-able areas                  | USGS                                                                                                | Derived from SRTM global 1 arc-second DEM (~30 m horizontal resolution)                                                                                                                                                              | Created a slope raster; converted areas with slopes under 20% and under 100 masl into polygons (QGIS 2.10) | Selected cells slope raster values less 20% and elevation values less than 100m with a raster calculator; converted the output to polygons.                                                                                                                                                                                                                       |
| Ocean within 10km | Connected ocean area                         | NA                                                                                                  | NA                                                                                                                                                                                                                                   | Cost Distance with a barrier (ArcGIS 10.2)                                                                 | Created a cost raster with ocean area cost values set to 1 and land area cost values set to NA, in essence making a barrier to travel though land areas; pixels within 10 km travel distance (limited to transit by ocean areas only) were selected and converted to polygons.                                                                                    |

|                                        |                                            |                                                                                                           |                                                                                                                                                                                                                                                        |                                                                                                                              |                                                                                                                                                                                                                                           |
|----------------------------------------|--------------------------------------------|-----------------------------------------------------------------------------------------------------------|--------------------------------------------------------------------------------------------------------------------------------------------------------------------------------------------------------------------------------------------------------|------------------------------------------------------------------------------------------------------------------------------|-------------------------------------------------------------------------------------------------------------------------------------------------------------------------------------------------------------------------------------------|
| Enumeration Areas( w/ population data) | Population                                 | Fiji Bureau of Statistics                                                                                 | 1   Population enumeration area (EA) shapefiles<br>2   2007 census data                                                                                                                                                                                | Join of EA shapefile with 2007 census data. Calculated population density (QGIS 2.10)<br>Export of forest layers (QGIS 2.10) | The population density of each EA was derived by intersecting each EA with the habitable area layer, calculating the density of the census population over that habitable area assuming a uniform spatial distribution of the population. |
| Forest Cover                           | Land cover                                 | Pacific Catastrophe Risk Assessment and Financing Initiative (PCRAFI)                                     | NA                                                                                                                                                                                                                                                     |                                                                                                                              | Selected polygons with land cover attributes of 'Forest' or 'Scattered Forest'. Derived the % of forest cover for each catchment by intersecting forest and catchments layers.                                                            |
| Pollution per catchment                | Modelled pollution estimates per watershed | Klein et al. (2012)                                                                                       | Derived from Klein et al. (2012) who estimated maximum pollution from a catchment assuming all forest is cleared; we modify those estimates by assuming total pollution is proportional to forest cover in a watershed. Polygons of village boundaries | New field calculation (QGIS 2.10)                                                                                            | Multiplied total modelled pollution per catchment by the % forest cover in each catchment.                                                                                                                                                |
| Villages                               | Village areas                              | Geospatial Information Management Unit, Fiji Department of Lands, Ministry of Lands and Mineral Resources |                                                                                                                                                                                                                                                        | None                                                                                                                         | None                                                                                                                                                                                                                                      |
| Buildings                              | Building features                          | PCRAFI                                                                                                    | Building footprint polygons; only in area around main cities.                                                                                                                                                                                          | Spatial join of attributes (QGIS 2.10)                                                                                       | Joined attributes from verified layer of buildings (points) to the polygon layer of buildings. The verified layer is also not complete.                                                                                                   |
| Roadways                               | Roadway networks                           | Geospatial Information Management Unit, Department of Lands, Ministry of Lands and Mineral Resources      | Comprehensive road network layer with breakdown by sealed and unsealed road sections                                                                                                                                                                   | None                                                                                                                         |                                                                                                                                                                                                                                           |

|                                                               |                                       |                                                                                                      |                                                                                                                          |                                                                                             |                                                                                                                                                                                                                                                                                                                                                             |
|---------------------------------------------------------------|---------------------------------------|------------------------------------------------------------------------------------------------------|--------------------------------------------------------------------------------------------------------------------------|---------------------------------------------------------------------------------------------|-------------------------------------------------------------------------------------------------------------------------------------------------------------------------------------------------------------------------------------------------------------------------------------------------------------------------------------------------------------|
| Tramlines                                                     | Sugarcane tramline network            | Geospatial Information Management Unit, Department of Lands, Ministry of Lands and Mineral Resources | NA                                                                                                                       |                                                                                             |                                                                                                                                                                                                                                                                                                                                                             |
| Distance to Market Network                                    | Nearest major fish market by distance | NA                                                                                                   | Polyline network layer                                                                                                   | Connect mangroves to road network and shortest route to nearest fish market (GRASS GIS 6.4) | Mangrove centroids were connected to roads within 10 km using v.net function; the shortest distance to fish market over the road network was found using the v.net.distance function. Not all mangroves could reach a market over the road network.                                                                                                         |
| Planning units (PUs)                                          | Planning Unit                         | NA                                                                                                   | NA                                                                                                                       | Cost Allocation (ArcGIS 10.2)                                                               | The cost allocation tool was set to allocate areas to their nearest source mangrove polygon within a distance of 500m. Where mangroves are within 1 km of each other, the PU boundary is equidistant between the two; areas were converted to polygons.                                                                                                     |
| Mangrove depth                                                | Wave attenuation                      | NA                                                                                                   |                                                                                                                          | Cost Distance with barrier (ArcGIS 10.2)                                                    | The coastline layer was rasterised; mangrove areas were given a value of 1 and non-mangrove areas given a value of NA, creating a barrier. The distance to ocean was calculated as the nearest distance of a cell to ocean through mangrove, e.g., not a straight line. Not all mangroves had direct connection to the ocean and thus couldn't be included. |
| Mangrove depth at points where wave protection is provisioned | Coastal protection                    | NA                                                                                                   | Derived from overlap of the edge of mangrove areas and infrastructure of interest, .e.g., buildings, roads and tramlines | Point sampling of mangrove depth (QGIS 2.10)                                                | Created a 75 m buffer around buildings and infrastructure and created points where the buffer intersected with the landward edge of a mangrove; the depth of the raster at those points was extracted and the mean value for each mangrove was calculated from the mangrove depth raster.                                                                   |
| Population per PU                                             | Estimated Population                  | NA                                                                                                   | Derived from:<br>- PU layer<br>- Habitable area layer<br>- Population enumeration area                                   | Polygon intersections (QGIS 2.10)                                                           | The area of the PU was multiplied by the population density of the EA in which it was located. Where a PU overlapped more than one EA, the estimated population within the portion of each EA falling within the PU was first calculated, and then estimated populations from each EA portion were summed.                                                  |

|                             |                                 |        |                                                                                                                                  |                                                                 |                                                                                                                                                                                                                                                                                                                                                                                                                                                                                                                                                                                                                      |
|-----------------------------|---------------------------------|--------|----------------------------------------------------------------------------------------------------------------------------------|-----------------------------------------------------------------|----------------------------------------------------------------------------------------------------------------------------------------------------------------------------------------------------------------------------------------------------------------------------------------------------------------------------------------------------------------------------------------------------------------------------------------------------------------------------------------------------------------------------------------------------------------------------------------------------------------------|
| PU<br>Population at<br>risk | Estimated<br>population         | NA     | Derived from:<br>- Population per PU<br>- Sub 10 mamsl layer                                                                     | Polygon Intersections<br>(QGIS 2.10)                            | The estimated population of a PU was multiplied by the % of the PU under 10 mamsl; this assumes equal population density in the PU. Where a PU overlapped more than one EA (as above) the estimated population of the portion of each EA under 10 masml within a PU was first calculated, and then summed.                                                                                                                                                                                                                                                                                                           |
| Sub 10m risk<br>zone        | Elevation                       | USGS   | Derived from SRTM<br>global 1 arc-second<br>DEM (~30 m<br>horizontal resolution;<br>Note: < 16 absolute<br>vertical height error | Extract areas under<br>10masml (QGIS 2.10)                      | Used a raster calculator to select areas with an elevation under 10 mamsl; converted the layer to polygons.                                                                                                                                                                                                                                                                                                                                                                                                                                                                                                          |
| Buildings at<br>risk        | Buildings in<br>sub-10m<br>zone | PCRAFI |                                                                                                                                  | Polygon intersections<br>(QGIS 2.10),<br>Linear model (R 3.2.1) | The number of residential buildings within 100m of the landward mangrove edge was derived for urban areas where some buildings footprints have been polygonised and are available. Outside of those areas we modeled the estimated number of residential buildings as a function of village area by extracting buildings polygons within 'village' areas nearby to urban centers where shapefile data are available. Assuming that all villages in Fiji have similar densities and building types, we used the coefficients of that model to estimate the number of residential buildings in other village polygons. |
